# Supplementary material
Source: Springer Nature journal article supplement (https://www.springermedizin.de/resource/supplementary/12889_2013_6532_MOESM1_ESM.pdf/9498368)
Supplement: MOESM1 [file 9498368]

HIV infected MSM enrolled in  
IPEC/FIOCRUZ Men Cohort

N= 294

Anal intercourse with HIV-  
negative or unknown serostatus  
male partner in the past 3 months

N= 155

Unprotected anal intercourse  
with HIV-negative or unknown  
serostatus male partner in the  
past 3 months

N= 63

- No male sexual partner/anal intercourse with men in the past 3 months: n= 85;
- Anal intercourse only with HIV-positive partner: n=34;
- Missing anal intercourse data: n= 20
